# Supplementary material for: Extracellular vesicles derived from MSCs activates dermal papilla cell in vitro and promotes hair follicle conversion from telogen to anagen in mice
Source: PubMed Central journal article supplement (PMC5686117; doi:10.1038/s41598-017-15505-3), 2017-11-14
Supplement: 41598_2017_15505_MOESM1_ESM.pdf [file 41598_2017_15505_MOESM1_ESM.pdf]

## Supplementary Information

### Extracellular vesicles derived from MSCs activates dermal papilla cell *in vitro* and promotes hair follicle conversion from telogen to anagen in mice

Ramya Lakshmi Rajendran<sup>1</sup>, Prakash Gangadaran<sup>1</sup>, Soon Sun Bak<sup>2</sup>, Ji Min Oh<sup>1</sup>, Senthilkumar Kalimuthu<sup>1</sup>, Ho Won Lee<sup>1</sup>, Se Hwan Baek<sup>1</sup>, Liya Zhu<sup>1</sup>, Young Kwan Sung<sup>2</sup>, Shin Young Jeong<sup>1</sup>, Sang-Woo Lee<sup>1</sup>, Jaetae Lee<sup>1</sup>, and Byeong-Cheol Ahn<sup>1,\*</sup>

<sup>1</sup>Department of Nuclear Medicine, Kyungpook National University School of Medicine/Hospital, Daegu 700-721, Republic of Korea.

<sup>2</sup>Department of Immunology, Kyungpook National University School of Medicine, Daegu 700-721, Republic of Korea.

#### \* Corresponding author

Byeong-Cheol Ahn, M.D., Ph.D.

Professor and Director

Department of Nuclear Medicine

Kyungpook National University School of Medicine and Hospital

50, Samduk 2-ga, Jung Gu, Daegu 700-721, Republic of Korea

Tel: 82-53-420-5583 Fax: 82-53-422-0864

E-mail: [abc2000@knu.ac.kr](mailto:abc2000@knu.ac.kr)

**A**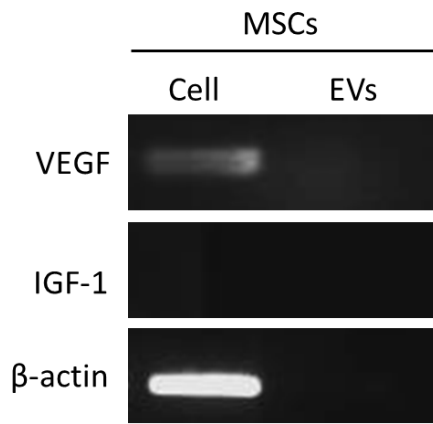**B**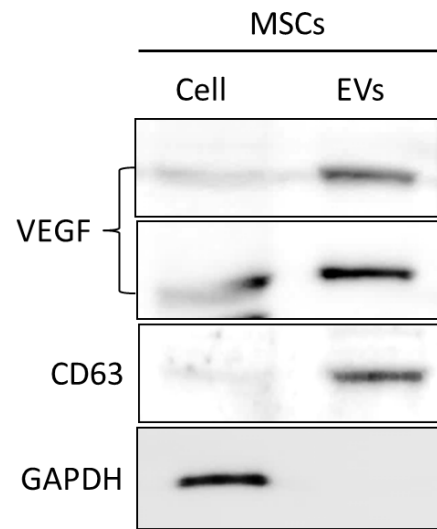

**Supplementary Figure – 1: Identification of growth factor mRNAs and proteins in MSC-EV.** (A) mRNAs (growth factor) expression in MSC cells and MSC-EVs. (B) Western blot analysis for VEGF protein in MSC cells and MSC-EVs. CD63 and GAPDH were used as internal loading controls.

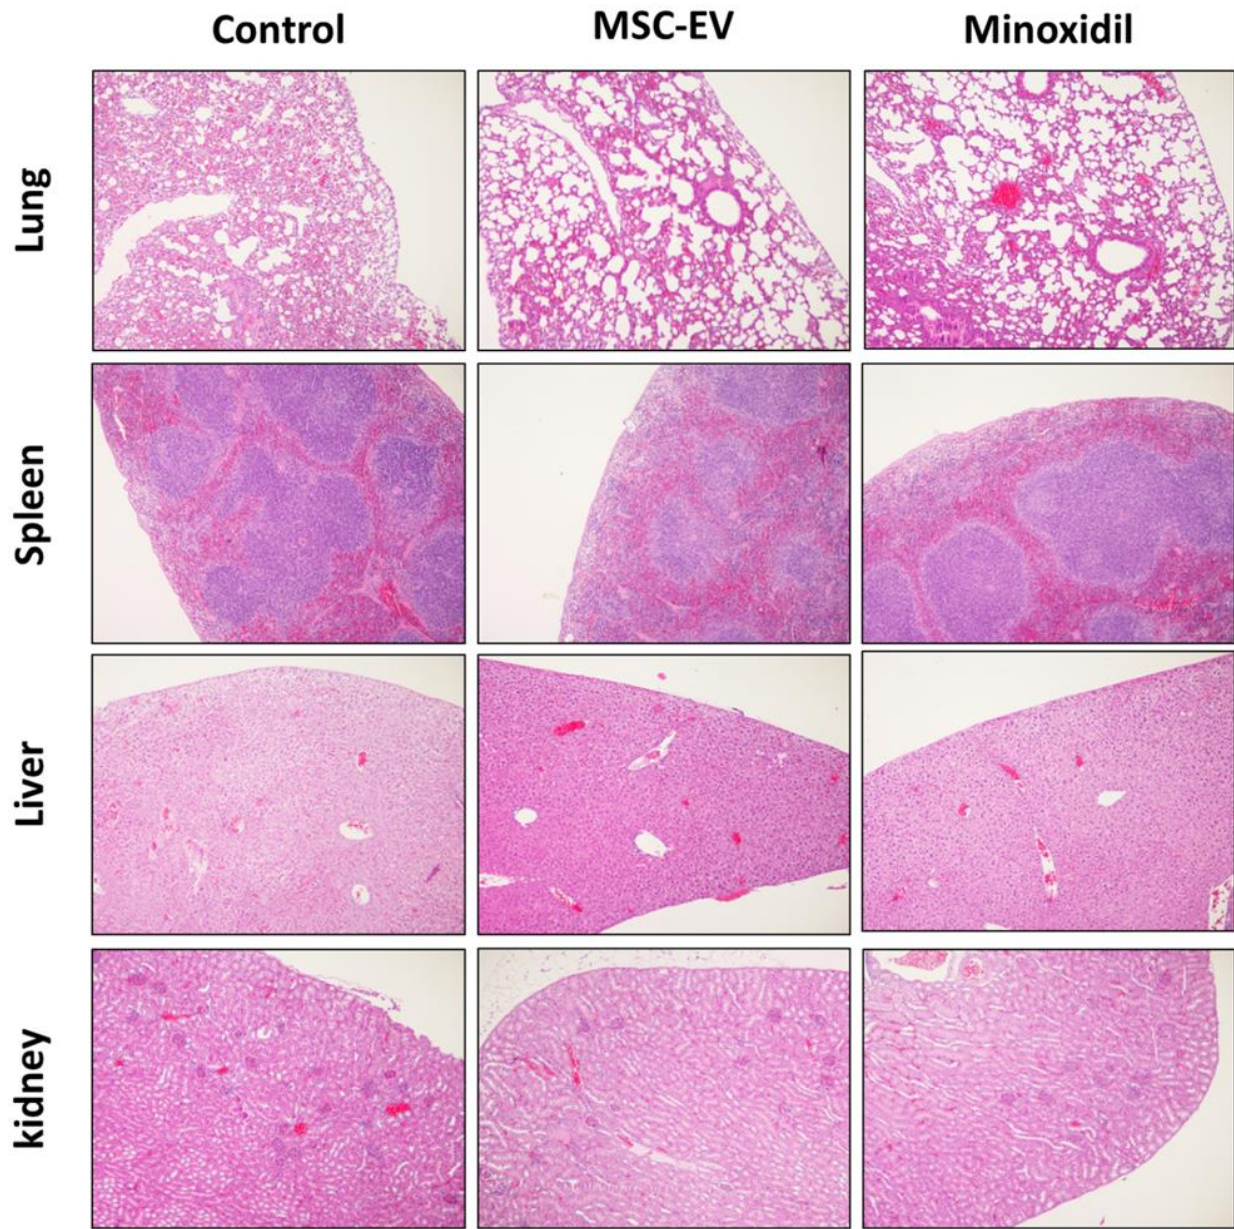

**Supplementary Figure - 2: Microscopic examination of organs from mice in the different groups.** Lung, liver, splenic, and kidney tissues were stained with H&E, and sections were examined under 20× magnification.

**Table - S1: List of antibodies used in this study**

| <b>Antibody</b>            | <b>Company</b> | <b>Dilution</b> |
|----------------------------|----------------|-----------------|
| ALIX                       | Abcam          | 1:5000          |
| CD63                       | Abcam          | 1:5000          |
| GM130                      | Abcam          | 1:4000          |
| Calnexin                   | Abcam          | 1:4000          |
| Cytochrome c               | Abcam          | 1:4000          |
| pERK                       | Cell signaling | 1:5000          |
| ERK                        | Cell signaling | 1:5000          |
| pAKT                       | Cell signaling | 1:5000          |
| AKT                        | Cell signaling | 1:5000          |
| PCNA                       | Cell signaling | 1:6000          |
| Wnt3a                      | Abcam          | 1:5000          |
| Wnt5a                      | Abcam          | 1:5000          |
| Versican                   | ABR            | 1:5000          |
| Bcl-2                      | Cell signaling | 1:6000          |
| GAPDH                      | Abcam          | 1:10000         |
| HRP conjugated anti-rabbit | Cell signaling | 1:4000          |
| HRP conjugated anti-mouse  | Cell signaling | 1:4000          |

**Table – S2: List of primers used in this study**

| Gene           | Forward primer                | Reverse primer              |
|----------------|-------------------------------|-----------------------------|
| VEGF           | 5'-GCGAGTCTGTGTTTTTGCAG-3'    | 5'-TCTTCAAGCCATCCTGCGTG-3'. |
| IGF-1          | 5'-TCAACAAGCCACAGGGTAT-3'     | 5'-ACTCGTGCAGAGCAAAGGAT-3'  |
| KGF            | 5'-AATTCCAAGTCCACTGTCC-3'     | 5'-GACATGGATCCTGCCAACTT-3'  |
| HGF            | 5'-ACACCAGGGTGATTGAGACC-3'    | 5'-CGAGGCCATGGTGCTATACT-3'  |
| $\beta$ -actin | 5'- GGGAAATCGTGCGTGACATT - 3' | 5'-GGAGTTGAAGGTAGTTTCGT- 3' |
